# Supplementary material for: Association of folate intake and plasma folate level with the risk of breast cancer: a dose-response meta-analysis of observational studies
Source: publisher site journal article supplement (doi:10.18632/aging.103881), 2020-11-04
Supplement: Supplementary file [file aging-v12i21-103881-supplementary-material-SD1.pdf]

**SUPPLEMENTARY FIGURES**

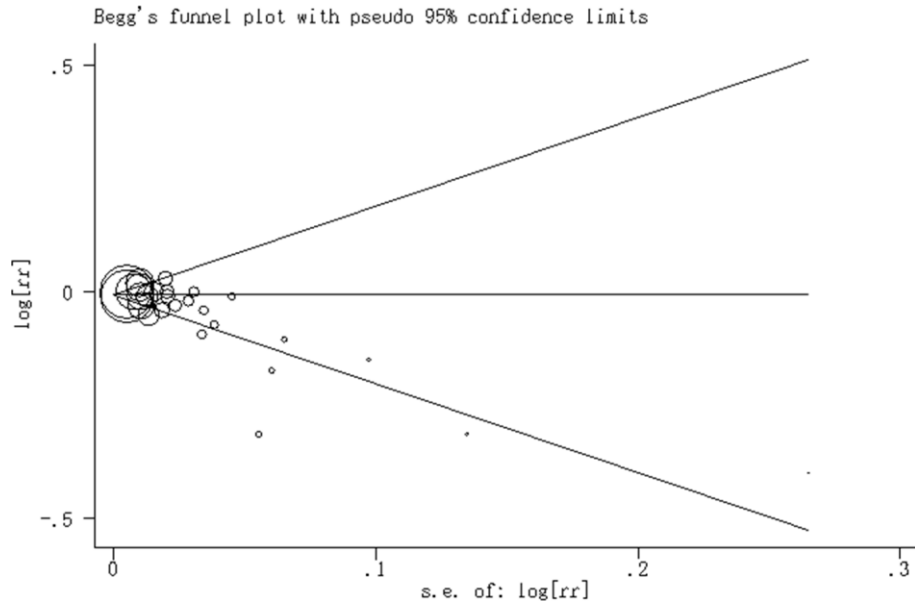

Supplementary Figure 1. Funnel plot of meta-analysis of breast cancer risk in relation to folate intake increment (per 100ug/day).

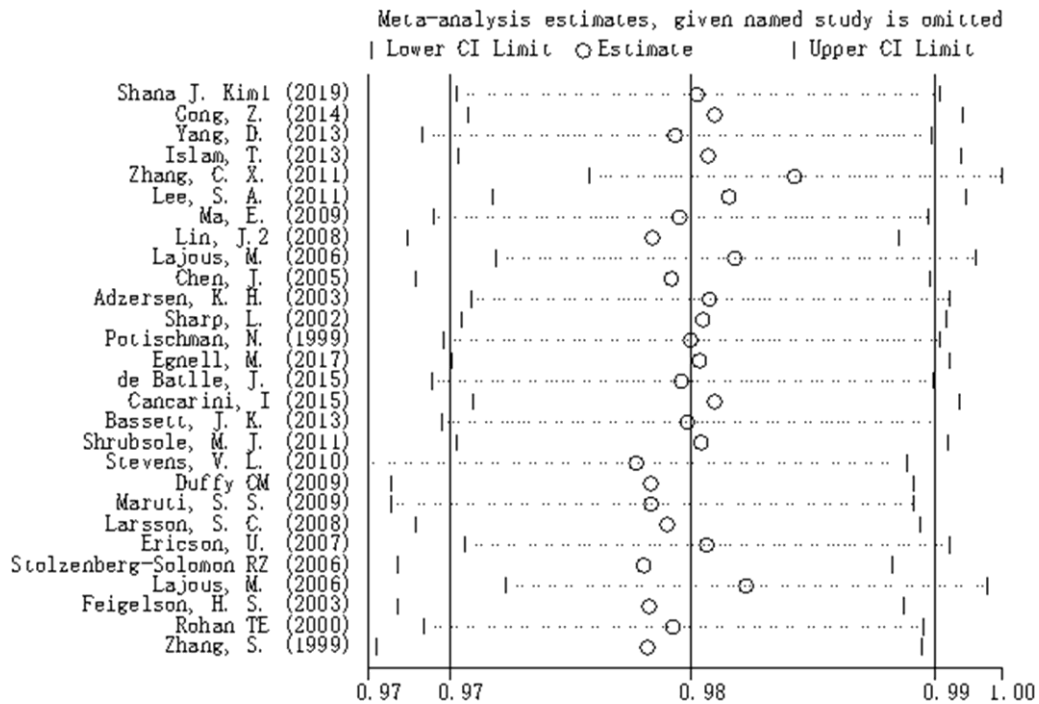

Supplementary Figure 2. Sensitivity analysis of meta-analysis of breast cancer risk in relation to folate intake increment (per 100ug/day).

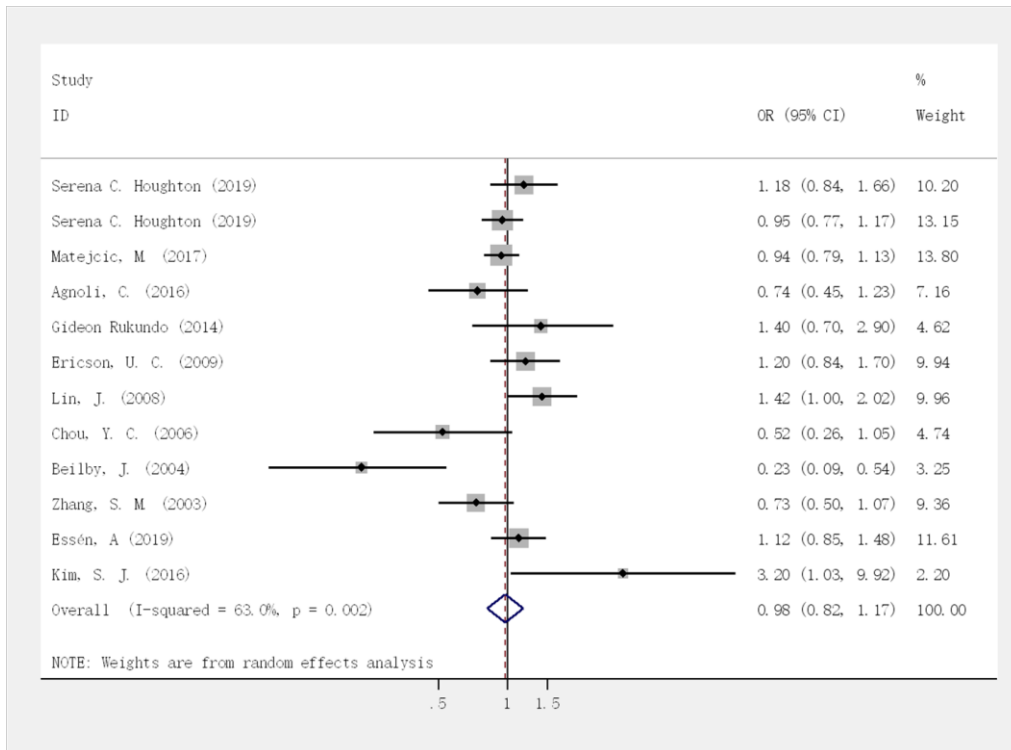

**Supplementary Figure 3. Forest plot of meta-analysis of breast cancer risk in relation to highest vs lowest categories of plasma folate.** Note: Weights are from random-effects analysis. Abbreviations: OR, odds ratio; CI, confidence interval.

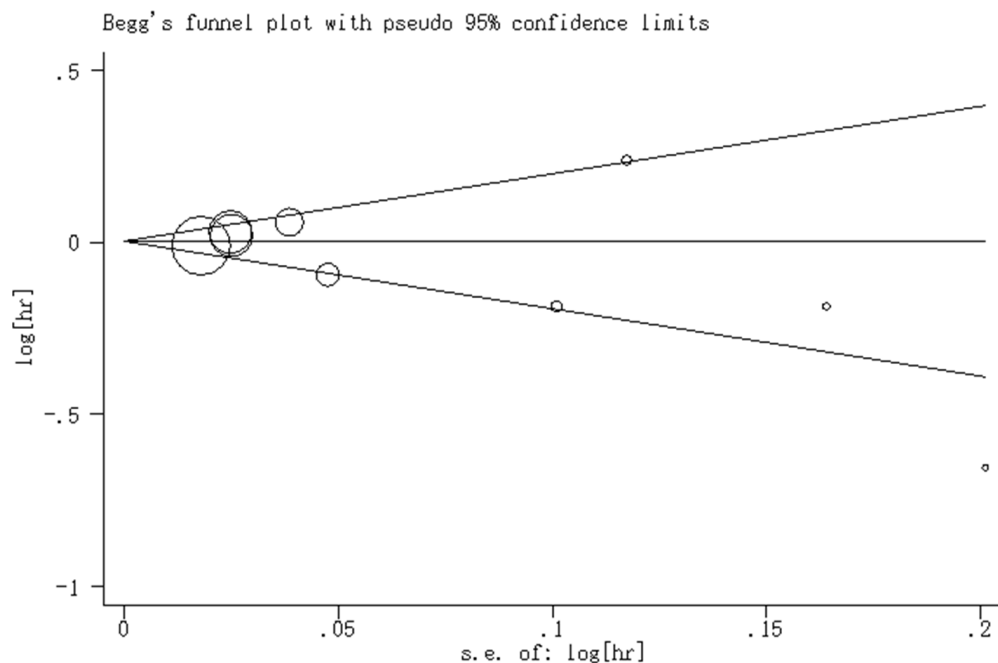

**Supplementary Figure 4. Funnel plot of meta-analysis of breast cancer risk in relation to plasma folate increment (per 5ng/ml).**

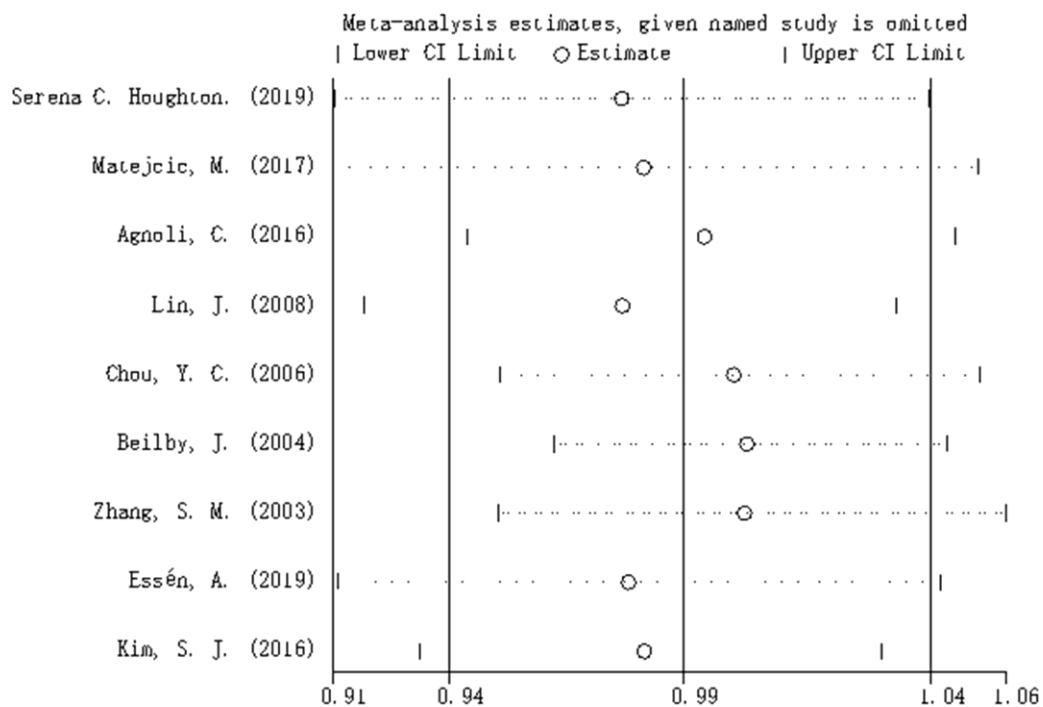

Supplementary Figure 5. Sensitivity analysis of meta-analysis of breast cancer risk in relation to plasma folate increment(per 5ng/ml).
