# Supplementary material for: Association of folate intake and plasma folate level with the risk of breast cancer: a dose-response meta-analysis of observational studies
Source: publisher site journal article supplement (doi:10.18632/aging.103881), 2020-11-04
Supplement: Supplementary file [file aging-v12i21-103881-supplementary-material-SD2.pdf]

**SUPPLEMENTARY TABLE**

**Supplementary Table 1. Features of studies included in the meta-analysis of plasma folate and breast cancer risk.**

| author                  | country | study type   | Follow-up period (year) | Age(year) | Number of cases/controls/peers | plasma folate (ng/mL)      | Adjusted OR(95% CI) | Adjustment factors                                                                                                                                                                                                                                               |
|-------------------------|---------|--------------|-------------------------|-----------|--------------------------------|----------------------------|---------------------|------------------------------------------------------------------------------------------------------------------------------------------------------------------------------------------------------------------------------------------------------------------|
| Serena C. Houghton.2019 | US      | Case-control | 4.75                    | 32-53     | 610/1207                       | ≥23.7 VS <10.2             | 1.18(0.84-1.66)     | matching factors, age at menarche, parity/age at first birth, history of breast cancer in mother or a sister, history of benign breast disease, height, body mass index at age 18, weight change since 18, and alcohol intake.                                   |
| Serena C. Houghton.2019 | US      | Case-control | 1990-2006               | 30-55     | 2241/2241                      | ≥15.6 VS <4.7              | 0.95(0.77-1.17)     | age at menarche, parity/age at first birth, age at menopause, family history of breast cancer in mother or a sister, history of benign breast disease, height, body mass index at 18, weight change from age 18, and alcohol intake at blood collection in 1990. |
| Matejic, M.2017         | Europe  | Case-control | 1992-2010               | 35-70     | 2491/2521                      | >19.80 VS <9.82            | 0.94(0.79-1.13)     | date at blood collection, education, BMI, height, physical activity, ever use of hormone replacement therapy, alcohol intake, parity and age at first full-term birth combined, total energy intake and family history of breast cancer.                         |
| Agnoli, C.2016          | Italy   | Case-control | 14.9                    | 35-65     | 276/276                        | 8.600-15.35 VS 2.609-5.968 | 0.74(0.45-1.23)     | age, menopausal status, recruitment date, and distance between ORDET and EPIC recruitment, family history of breast cancer, age at menarche, parity, oral contraceptive use, smoking status, education, alcohol consumption, and BMI.                            |
| Gideon Rukundo.2014     | Uganda  | Case-control | 2012.1-2012.5           | >18       | 72/73                          | normal VS low              | 1.4(0.7-2.9)        | age, parity, age at menarche and menopause, BMI, residence, use of hormonal contraception, tobacco use versus no tobacco usage, alcohol consumption, hemoglobin level.                                                                                           |
| Ericson, U. C.2009      | Sweden  | Case-control | 1996-2004               | 55-73     | 313/626                        | 17 VS 6                    | 1.20(0.84-1.70)     | age, blood-sampling date, weight, height, menopausal hormone therapy, age at menopause category, parity, household work category, socioeconomic status, smoking, total energy intake, and alcohol intake category.                                               |
| Lin, J.2008             | US      | Case-control | 1993-2004               | ≥45       | 848/848                        | >15.8 VS ≤5.1              | 1.42(1.00-2.02)     | matching variables, age, randomized treatment assignment, BMI, family history of breast cancer in a                                                                                                                                                              |

|                  |           |              |                |       |           |                 |                 |                                                                                                                                                                                                                                                                                                                                                               |
|------------------|-----------|--------------|----------------|-------|-----------|-----------------|-----------------|---------------------------------------------------------------------------------------------------------------------------------------------------------------------------------------------------------------------------------------------------------------------------------------------------------------------------------------------------------------|
| Chou, Y. C.2006  | Taiwan    | Case-control | 2004.1-2004.12 | 20-80 | 146/285   | >14.42 VS <8.16 | 0.52(0.26-1.05) | first-degree relative, history of benign breast disease, smoking, physical activity, alcohol consumption, age at menarche, age at menopause, parity, and age at first birth.<br>sociodemographic characteristics, menstrual and reproductive history, menopausal status, lifestyle and medical history as well as family history of breast and other cancers. |
| Beilby, J.2004   | Australia | Case-control | 1992-1994      | 30-84 | 141/109   | >9.0 VS <5.0    | 0.23(0.09-0.54) | C677T genotype, age of menarche, parity, alcohol intake, total fat intake.<br>age at menarche, parity, age at first birth, age at menopause, history of breast cancer in mother or a sister, history of benign breast disease, alcohol intake, body mass index at age 18y, body mass index at blood collection, and duration of postmenopausal hormone use.   |
| Zhang, S. M.2003 | America   | Case-control | 1989-1996      | 43-69 | 712/712   | >14 VS <4.6     | 0.73(0.50-1.07) | age, education level, SES, CCI, serum glucose, triglycerides, cholesterol and fasting status.<br>age at baseline and date of blood sample collection, BRCA mutation type, parity, baseline alcohol consumption, baseline regular smoker, and baseline regular coffee consumer.                                                                                |
| Essén, A.2019    | Sweden    | Cohort       | 14             | >20   | 795/19775 | >32 VS <5       | 1.12(0.85-1.48) |                                                                                                                                                                                                                                                                                                                                                               |
| Kim, S. J.2016   | Canada    | Cohort       | 6.3            | 18-70 | 20/164    | >24.4 VS ≤24.4  | 3.20(1.03-9.92) |                                                                                                                                                                                                                                                                                                                                                               |

Abbreviations: OR, odds ratio; CI, confidence interval; BMI, body mass index; BRCA, breast cancer; EPIC: european prospective investigation into cancer and nutrition; SES: socioeconomic status; CCI: platelet count increase index.
